# Supplementary material for: Humidity sensors based on graphene/SnOx/CF nanocomposites
Source: Royal Society of Chemistry journal article supplement (doi:10.1039/c4tc00440j), 2014-01-01
Supplement: c4tc00440j1.pdf [file c4tc00440j1.pdf]

## **Humidity Sensors Based on Graphene/SnO<sub>x</sub>/CFs**

### **Nanocomposites**

*Tao Fu, Jian Zhu, Ming Zhuo, Bingkun Guan, Jidong Li, Zhi Xu, Bingan Lu, and Qihong Li\**

**Fig. S1**

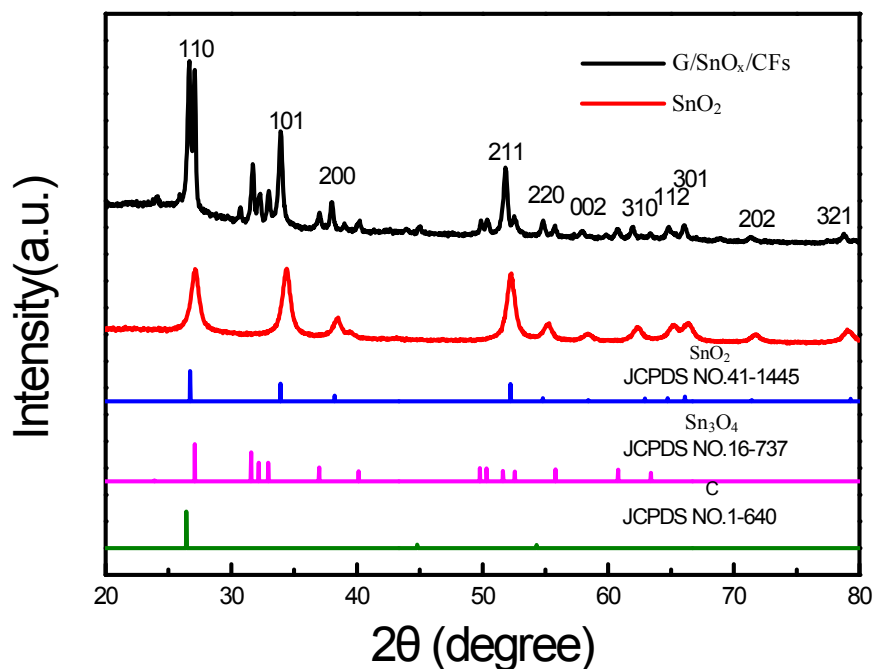

**Fig. S1** XRD pattern of pure SnO<sub>2</sub> nanofibers and G/SnO<sub>x</sub>/CFs

Fig. S1 is the XRD pattern of pure SnO<sub>2</sub> nanofibers and G/SnO<sub>x</sub>/CFs. All the peaks were similar to rutile phase SnO<sub>2</sub>. Some additional weak peaks corresponding to Sn<sub>3</sub>O<sub>4</sub> were also observed. Moreover, no peaks of carbon were found in XRD pattern which indicated that the carbon in SnO<sub>x</sub>/CFs could be amorphous.

**Fig. S2**

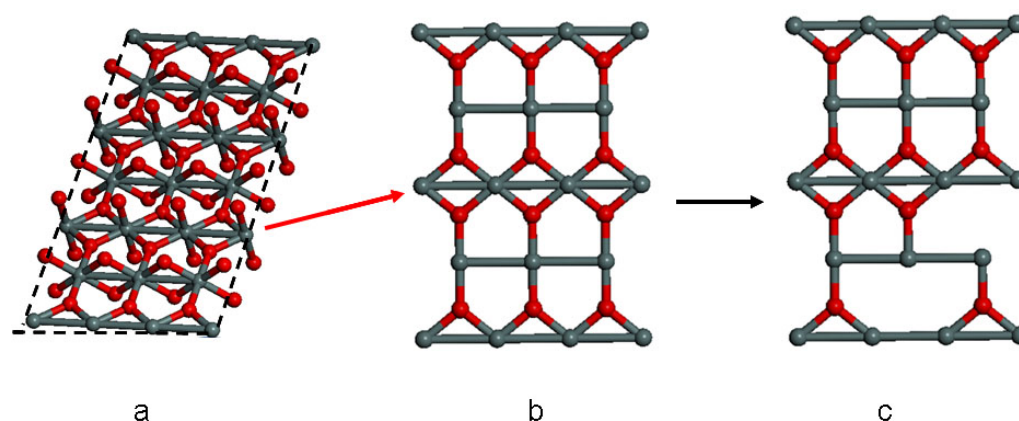

**Fig. S2** Ball-and-stick model of SnO<sub>2</sub>. (a) stereostructure of SnO<sub>2</sub>, (b) an oxygen vacancy free plane of SnO<sub>2</sub>, (c) a plane of SnO<sub>2</sub> with oxygen vacancy. Red atoms: O; Grey atoms: Sn.

It is well known that metal oxides can lose oxygen, resulting in the formation of oxygen vacancy. The crystal structure of SnO<sub>2</sub> and oxygen vacancies in SnO<sub>2</sub> can be seen from Fig. S2. Fig. S2b is a plane of the crystal structure which is helpful to understand the oxygen vacancy

structure. From the ball-and-stick model and compared with Fig. S2b, two oxygen atoms were missed in Fig. S2c which formed two oxygen vacancies.

**Fig. S3**

| Materials                           | measured parameter | Test Range (%RH) | Response Time (s) | Recovery Time (s) | $\Delta RH/T_{res}$ (%RH/s) | $\Delta RH/T_{rec}$ (%RH/s) | Reference                                             |
|-------------------------------------|--------------------|------------------|-------------------|-------------------|-----------------------------|-----------------------------|-------------------------------------------------------|
| single SnO <sub>2</sub> nanowire    | current            | 5%-30%           | 120               | 20                | 0.208                       | 1.250                       | J. AM. CHEM. SOC. 129, (2007), 6070-6071              |
| single SnO <sub>2</sub> zigzag belt | resistance         | 5%-22.5%         | 30                | 80                | 0.583                       | 0.219                       | Cryst. Res. Technol. 45, (2010), 539 – 544            |
| SnO <sub>2</sub> nanoparticles      | resistance         | 5%-95%           | 32                | 25                | 2.813                       | 3.600                       | Materials Science and Engineering C 31 (2011) 840–844 |
| G/SnO <sub>x</sub> /CFs             | resistance         | 30%-55%          | 8                 | 6                 | 3.125                       | 4.167                       | this work                                             |

Actually, the response and recovery time are not comparable because of the difference in test range. To be more precisely,  $RH_s$ , the ratio of  $\Delta RH/T_{res}$  or  $\Delta RH/T_{rec}$  is determined. Where  $\Delta RH$  is the difference of relative humidity,  $T_{res}$  is response time and  $T_{rec}$  is recovery time.

From the table above, the variation of relative humidity for one second in our work is higher than reported, which indicates that humidity sensor based on graphene/SnO<sub>x</sub>/CFs has a fast response to the variation of humidity.
